# Supplementary material for: Combined Analysis of Variation in Core, Accessory and Regulatory Genome Regions Provides a Super-Resolution View into the Evolution of Bacterial Populations
Source: PubMed Central journal article supplement (PMC5019451; doi:10.1371/journal.pgen.1006280), 2016-09-12

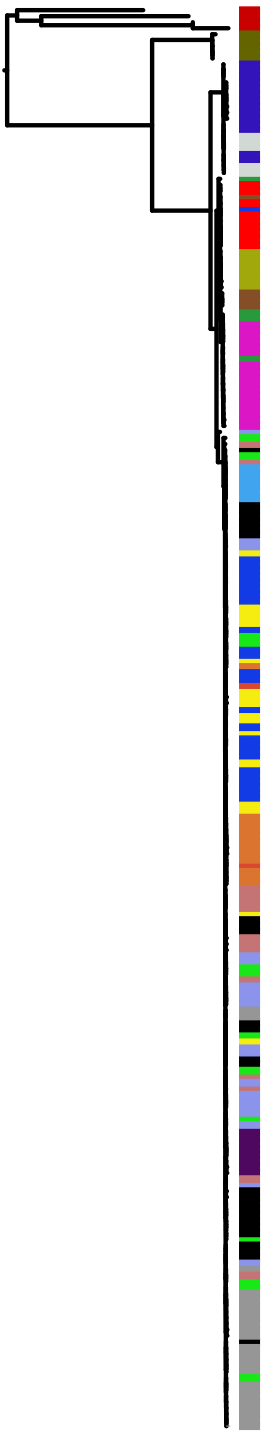

**A - Accessory genome cluster**

- 1
- 2
- 3
- 4
- 5
- 6
- 7
- 8
- 9
- 10
- 11
- 12
- 13
- 14
- 15
- 16
- 17

**B- Geographical source**

- United Kingdom
- Mainland Europe
- Oceania
- China
- North America

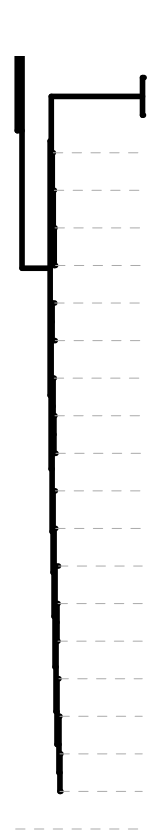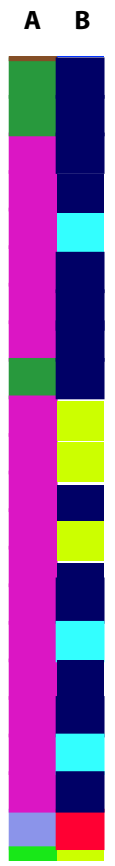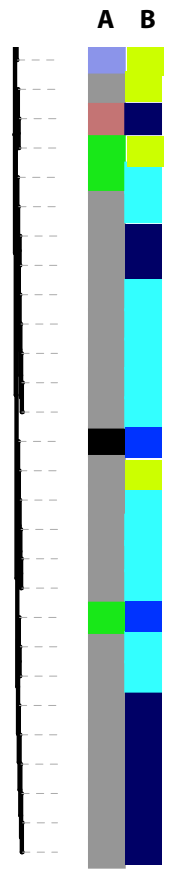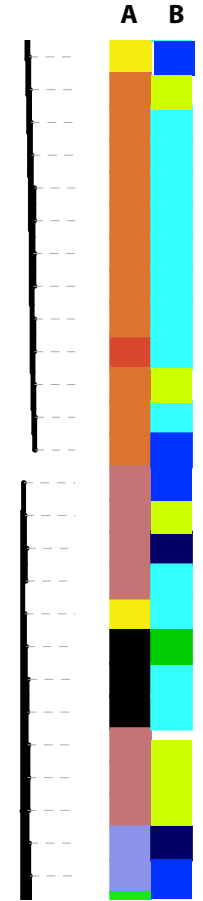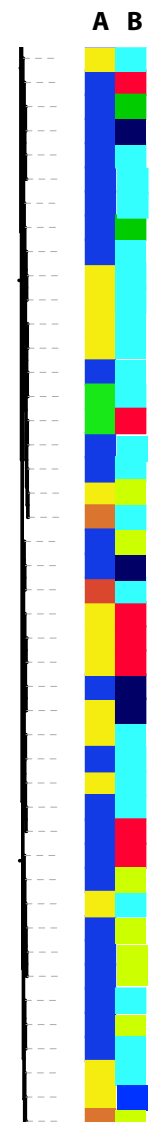

Supplement: pgen.1006280.s002.pdf [file pgen.1006280.s002.pdf]
