# Supplementary material for: Combined Analysis of Variation in Core, Accessory and Regulatory Genome Regions Provides a Super-Resolution View into the Evolution of Bacterial Populations
Source: PubMed Central journal article supplement (PMC5019451; doi:10.1371/journal.pgen.1006280), 2016-09-12
Supplement: pgen.1006280.s005.pdf [file pgen.1006280.s005.pdf]

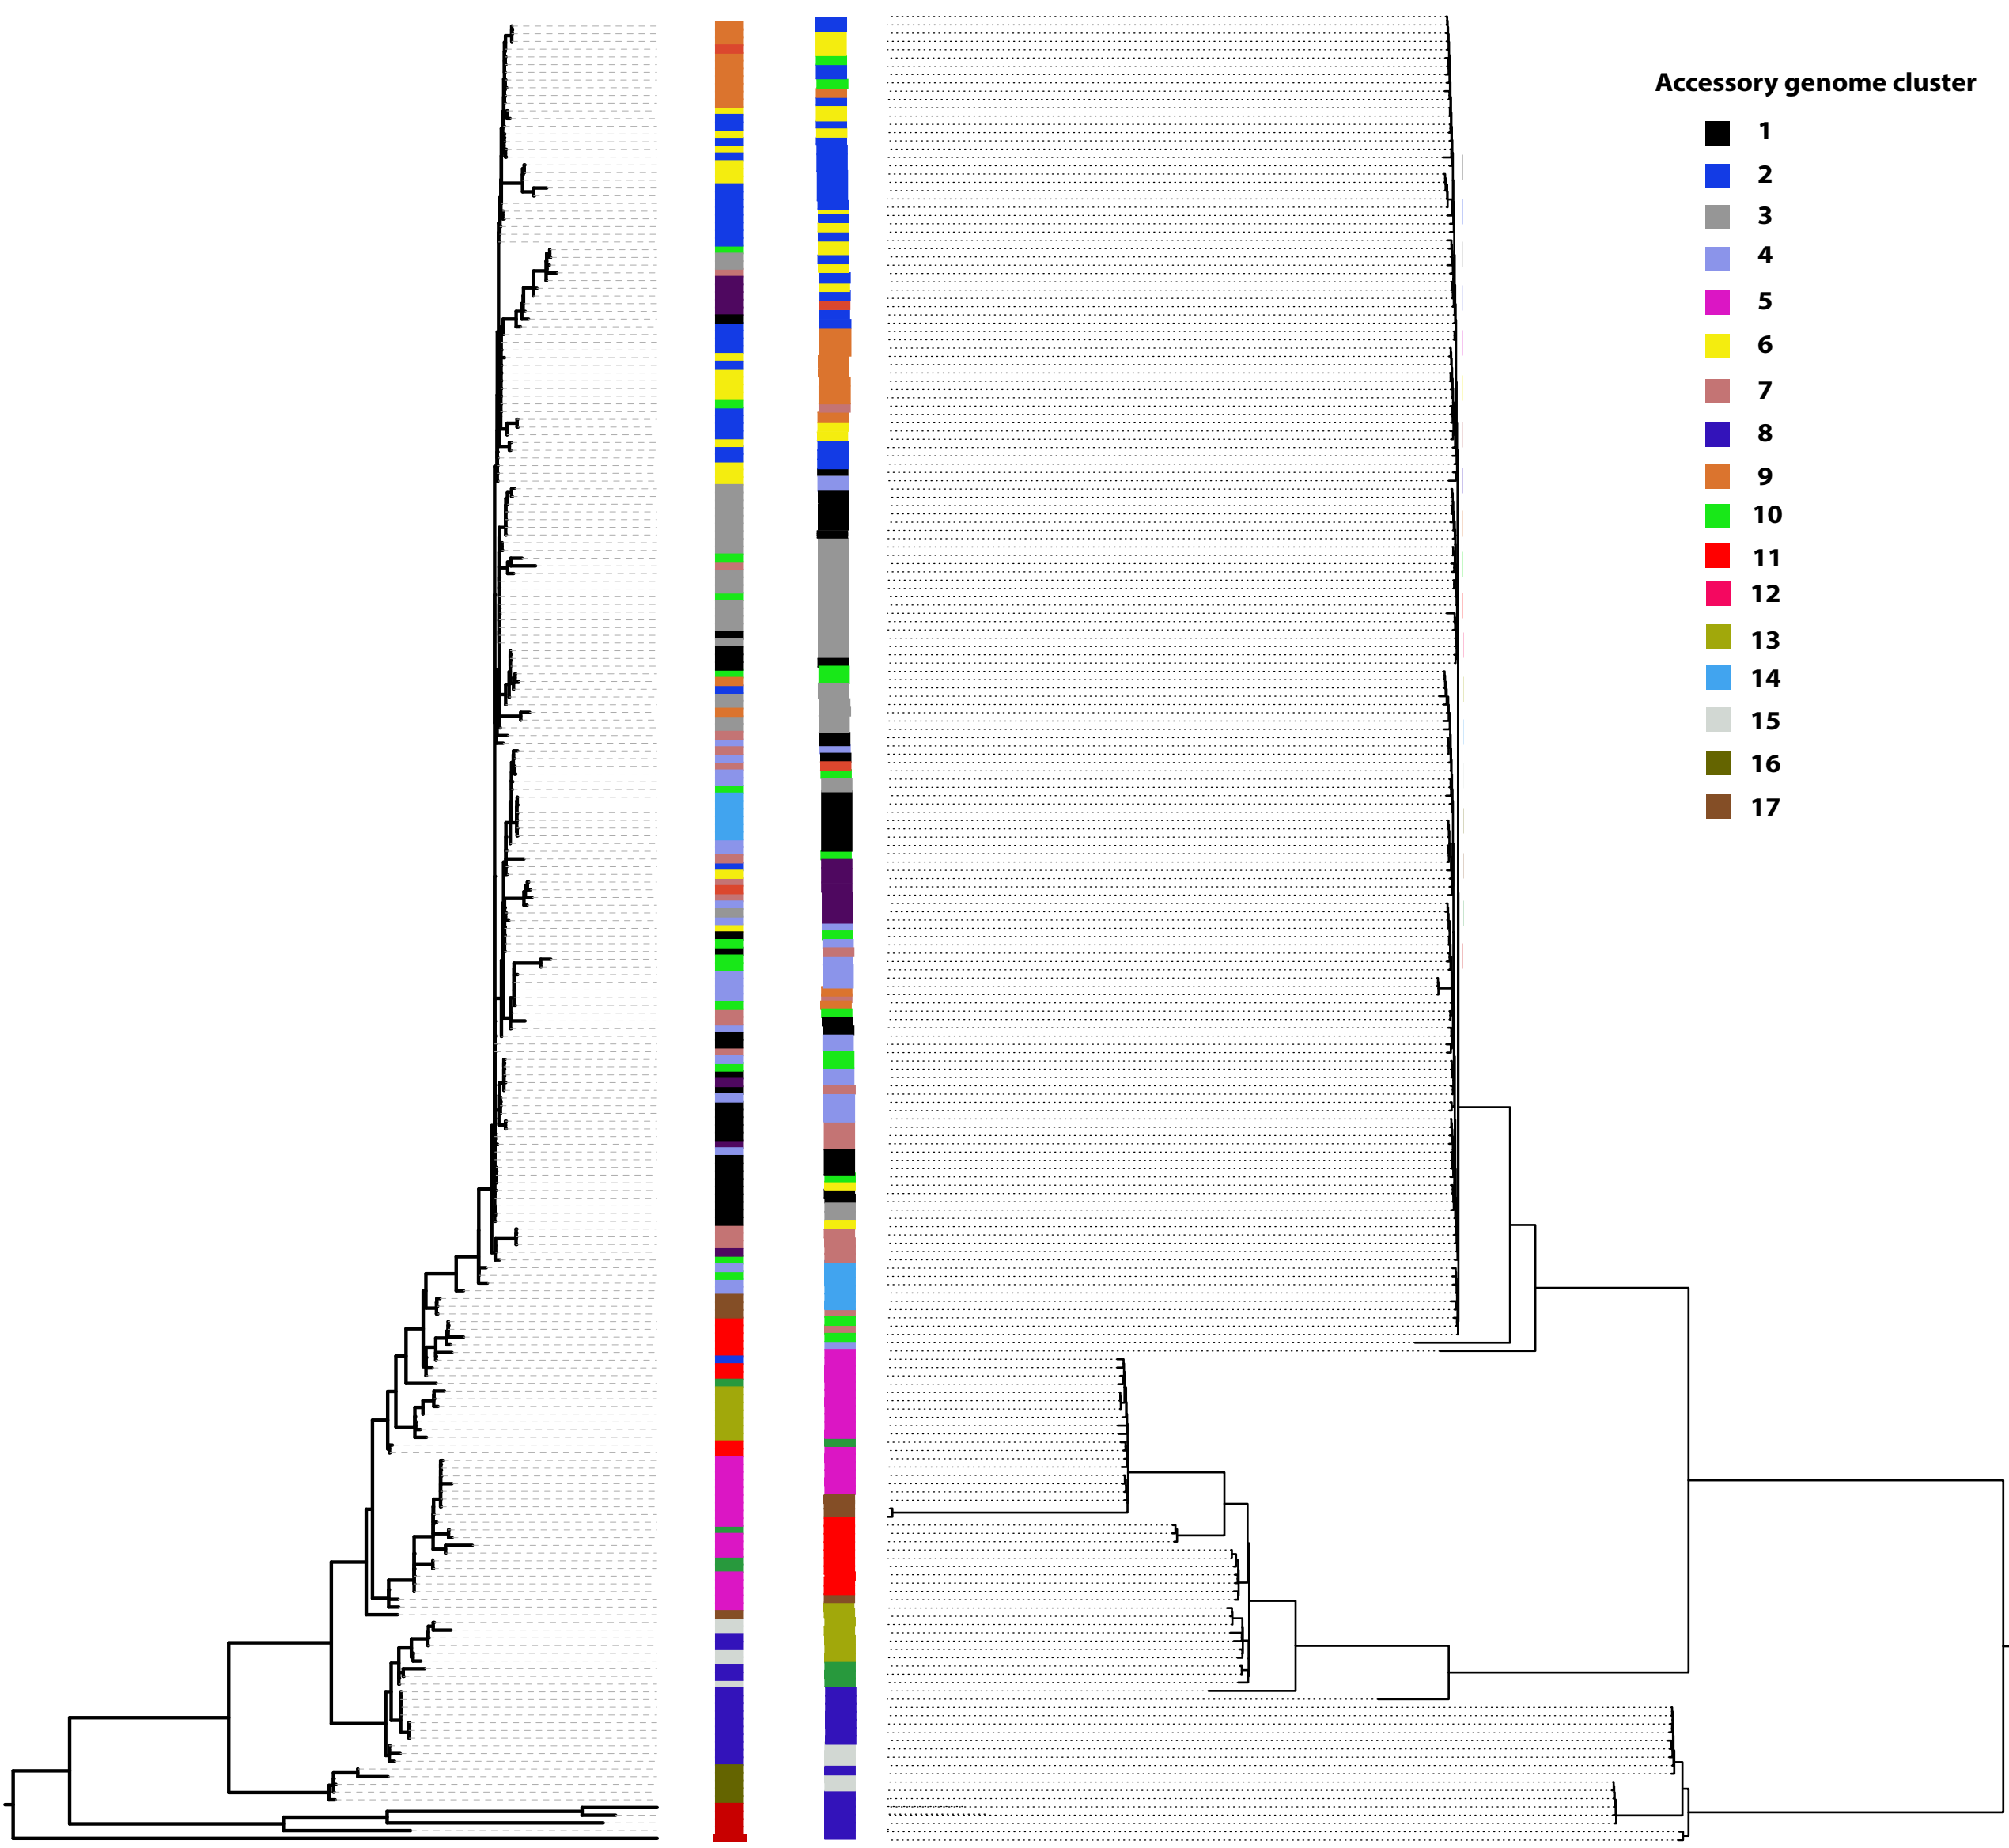

297 promoter phylogeny

297 CDS phylogeny

Robinson-Foulds distance 200 (86% incongruence)
