# Supplementary material for: Combined Analysis of Variation in Core, Accessory and Regulatory Genome Regions Provides a Super-Resolution View into the Evolution of Bacterial Populations
Source: PubMed Central journal article supplement (PMC5019451; doi:10.1371/journal.pgen.1006280), 2016-09-12

## Number of loci

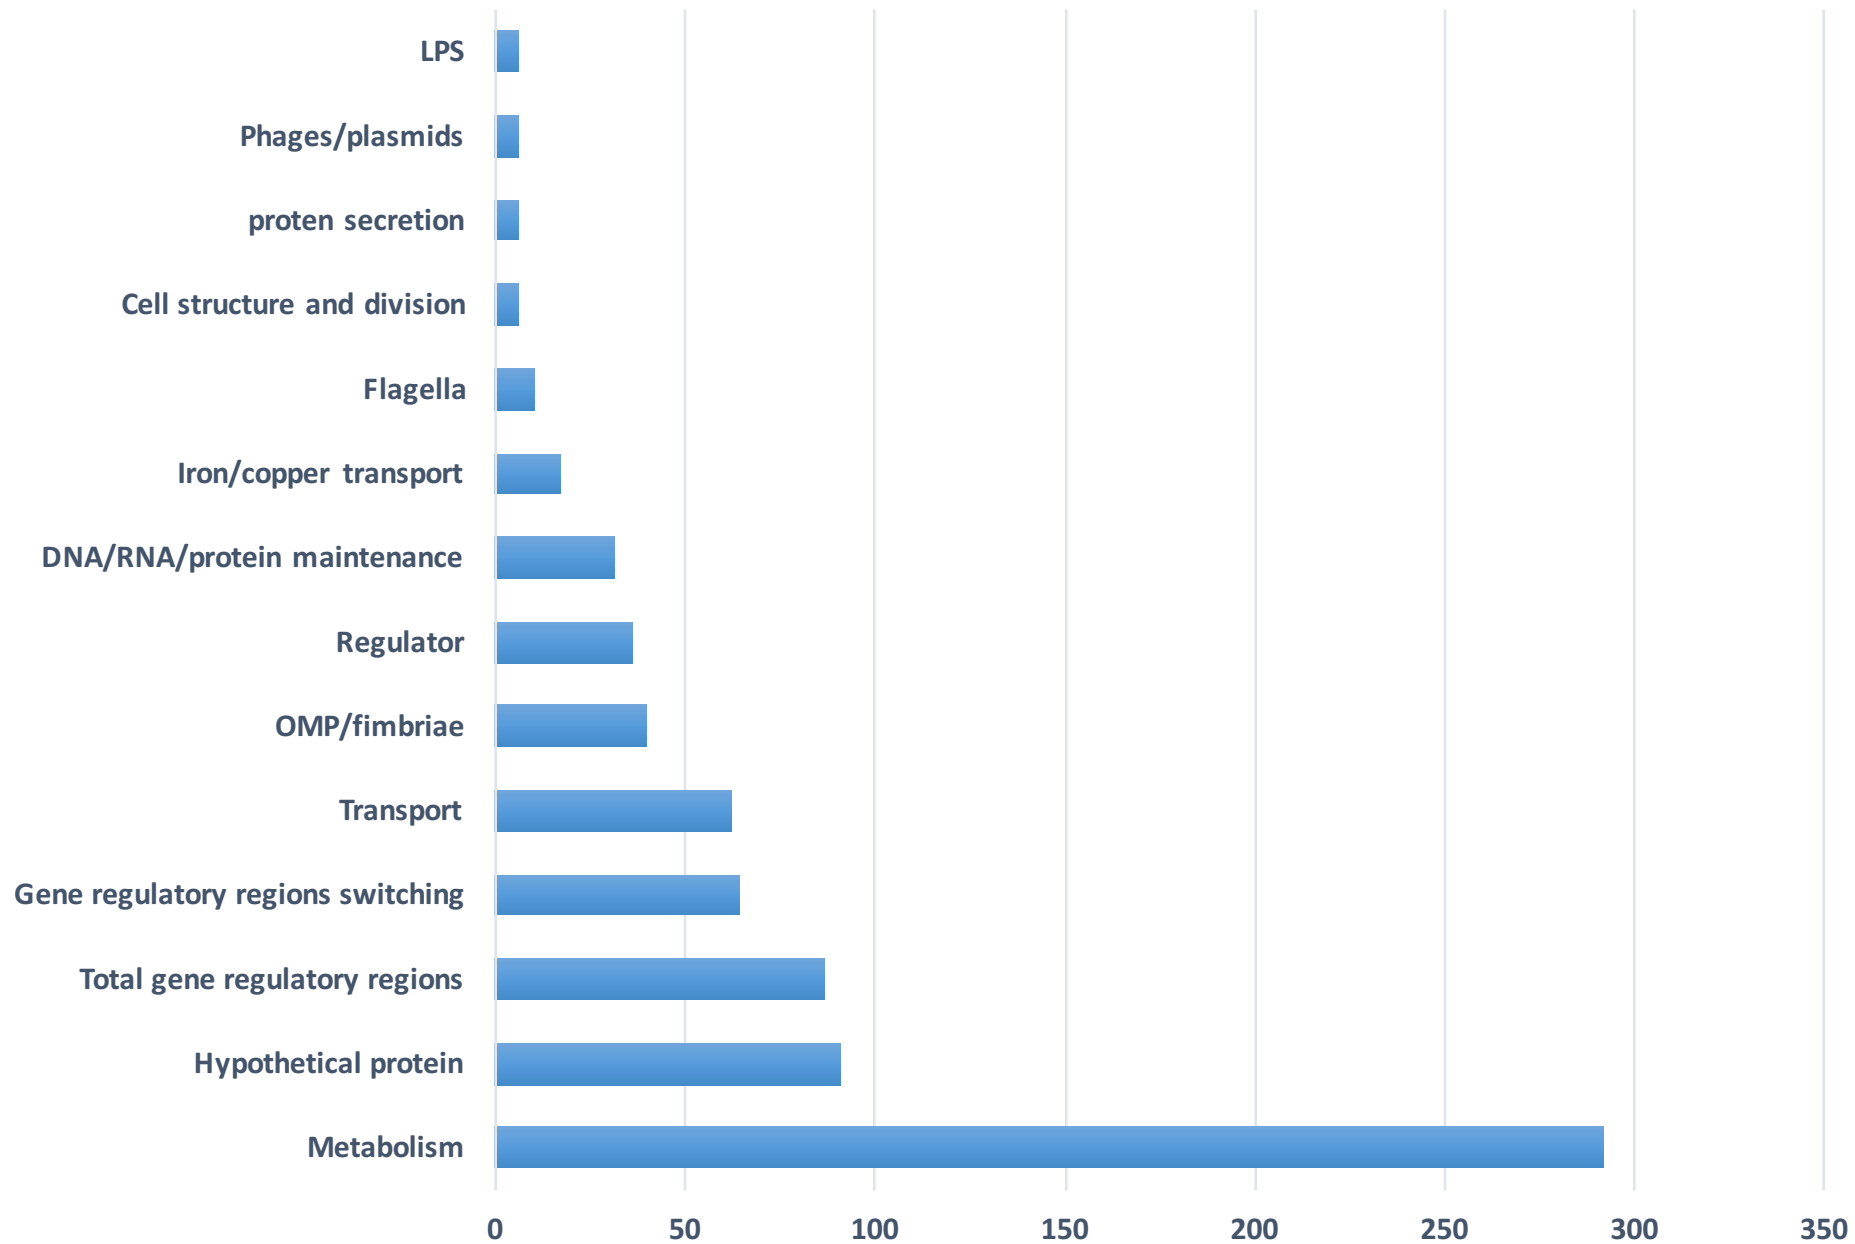

Supplement: pgen.1006280.s008.pdf [file pgen.1006280.s008.pdf]
